# Supplementary material for: Structural basis for the assembly and quinone transport mechanisms of the dimeric photosynthetic RC–LH1 supercomplex
Source: PubMed Central journal article supplement (PMC9007983; doi:10.1038/s41467-022-29563-3), 2022-04-13
Supplement: 41467_2022_29563_MOESM2_ESM.pdf [file 41467_2022_29563_MOESM2_ESM.pdf]

## Descriptions of additional Supplementary Information files

**Movie S1.** Comparison of the structures of the RC–LH1 Class-1 and Class-2 dimers. See also Fig. S10.

**Movie S2.** Coarse-grained molecular dynamics simulations of a quinone-free RC–LH1 Class-1 dimer illustrates that quinones can enter the RC–LH1 complex through the large opening of the S-shaped LH1 ring as the predominant quinone transport pathway. The full duration of the MD simulations was 5  $\mu$ s. The progression of the quinone movement is presented every 100 ns. Entering of quinone into the complex occurred during 2600 and 4100 ns.

**Movie S3.** Coarse-grained molecular dynamics simulations of the *Rba. sphaeroides* RC–LH1 Class-1 dimer containing the quinones Q<sub>A</sub>, Q<sub>B</sub>, Q<sub>3</sub> and Q<sub>Y</sub> (periplasmic view). The full duration of the MD simulations was 5  $\mu$ s. The progression of the quinone movement is presented every 10 ns.

**Movie S4.** Coarse-grained molecular dynamics simulations of the *Rba. sphaeroides* RC–LH1 Class-1 dimer containing the quinones Q<sub>A</sub>, Q<sub>B</sub>, Q<sub>3</sub> and Q<sub>Y</sub> (side view). The full duration of the MD simulations was 5  $\mu$ s. The progression of the quinone movement is presented every 10 ns.

**Data S1.** Mass spectrometry data to identify the presence of PufY.

**Data S2.** Topologies and force-field parameters of TSCL in the itp format.

**Data S3.** Topologies and force-field parameters of SPO in the itp format.
