# Supplementary material for: Structural basis for the assembly and quinone transport mechanisms of the dimeric photosynthetic RC–LH1 supercomplex
Source: PubMed Central journal article supplement (PMC9007983; doi:10.1038/s41467-022-29563-3), 2022-04-13
Supplement: 41467_2022_29563_MOESM7_ESM.pdf [file 41467_2022_29563_MOESM7_ESM.pdf]

| Accession | Description                                                                                                                                                                    | Score  | Coverage | # Proteins | # Unique Peptides | # Peptides | # PSMs | # AA1 | MW [kDa] | calc. pI |
|-----------|--------------------------------------------------------------------------------------------------------------------------------------------------------------------------------|--------|----------|------------|-------------------|------------|--------|-------|----------|----------|
| Q3245     | ATP synthase subunit d1 OS-Rhodospirillum rubrum (strain ATCC 17023 / 2.4.1 / NCBI 8253 / DSM 158) OX-27294 (Gn- <i>atpD1</i> PE-3 Sv+1) [ATPR_RH056]                          | 184.21 | 46.11    | 11         | 11                | 58         | 194    | 15.7  | 50.7     | 9.07     |
| Q3144     | LigR-InvSensing protein B-0002 alpha chain OS-Rhodospirillum rubrum (strain ATCC 17023 / 2.4.1 / NCBI 8253 / DSM 158) OX-27294 (Gn- <i>atpB</i> PE-3 Sv+1) [LH4_RH056]         | 88.37  | 39.66    | 6          | 6                 | 30         | 58     | 4.9   | 39.9     | 5.30     |
| Q3145     | Uncharacterized protein OS-Rhodospirillum rubrum (strain ATCC 17023 / 2.4.1 / NCBI 8253 / DSM 158) OX-27294 (Gn- <i>atpB</i> PE-3 Sv+1) [Q3145_RH056]                          | 76.78  | 71.70    | 9          | 9                 | 72         | 106    | 11.9  | 19.7     | 9.00     |
| Q3146     | LigR-InvSensing complex, beta subunit OS-Rhodospirillum rubrum (strain ATCC 17023 / 2.4.1 / NCBI 8253 / DSM 158) OX-27294 (Gn- <i>atpB</i> PE-3 Sv+1) [Q3146_RH056]            | 76.72  | 47.66    | 2          | 2                 | 3          | 35     | 5.1   | 5.5      | 6.51     |
| Q3147     | ATP synthase subunit alpha OS-Rhodospirillum rubrum (strain ATCC 17023 / 2.4.1 / NCBI 8253 / DSM 158) OX-27294 (Gn- <i>atpA</i> PE-3 Sv+1) [ATPR_RH056]                        | 65.59  | 65.59    | 10         | 10                | 48         | 104    | 10.4  | 10.4     | 10.40    |
| Q3148     | Uncharacterized protein OS-Rhodospirillum rubrum (strain ATCC 17023 / 2.4.1 / NCBI 8253 / DSM 158) OX-27294 (Gn- <i>atpA</i> PE-3 Sv+1) [Q3148_RH056]                          | 63.91  | 48.45    | 4          | 4                 | 8          | 33     | 9.7   | 10.8     | 4.88     |
| Q3149     | ATP synthase subunit 2 OS-Rhodospirillum rubrum (strain ATCC 17023 / 2.4.1 / NCBI 8253 / DSM 158) OX-27294 (Gn- <i>atp2</i> PE-3 Sv+1) [ATPR_RH056]                            | 63.96  | 46.67    | 1          | 9                 | 9          | 32     | 18.0  | 18.7     | 5.00     |
| Q3150     | Uncharacterized protein OS-Rhodospirillum rubrum (strain ATCC 17023 / 2.4.1 / NCBI 8253 / DSM 158) OX-27294 (Gn- <i>atp2</i> PE-3 Sv+1) [Q3150_RH056]                          | 55.67  | 77.78    | 8          | 8                 | 30         | 90     | 16.1  | 16.1     | 6.55     |
| Q3117     | Cytochrome b5 hemoprotein form 1 OS-Rhodospirillum rubrum (strain ATCC 17023 / 2.4.1 / NCBI 8253 / DSM 158) OX-27294 (Gn- <i>cytB5</i> PE-3 Sv+1) [Q3117_RH056]                | 49.63  | 12.87    | 1          | 2                 | 14         | 109    | 12.9  | 13.17    | 5.17     |
| P1402     | Intrinsic membrane protein PufX OS-Rhodospirillum rubrum (strain ATCC 17023 / 2.4.1 / NCBI 8253 / DSM 158) OX-27294 (Gn- <i>pufX</i> PE-3 Sv+1) [PufX_RH056]                   | 40.44  | 25.61    | 2          | 2                 | 32         | 62     | 8.0   | 9.04     | 9.54     |
| Q3151     | Uncharacterized protein OS-Rhodospirillum rubrum (strain ATCC 17023 / 2.4.1 / NCBI 8253 / DSM 158) OX-27294 (Gn- <i>pufX</i> PE-3 Sv+1) [Q3151_RH056]                          | 39.19  | 36.47    | 3          | 3                 | 3          | 19     | 136   | 15.4     | 9.29     |
| Q3152     | Uncharacterized protein OS-Rhodospirillum rubrum (strain ATCC 17023 / 2.4.1 / NCBI 8253 / DSM 158) OX-27294 (Gn- <i>pufX</i> PE-3 Sv+1) [Q3152_RH056]                          | 38.92  | 36.47    | 2          | 2                 | 2          | 2      | 10    | 10       | 10.00    |
| Q3153     | 5S ribosomal protein L25 OS-Rhodospirillum rubrum (strain ATCC 17023 / 2.4.1 / NCBI 8253 / DSM 158) OX-27294 (Gn- <i>rplK25</i> PE-3 Sv+1) [Q3153_RH056]                       | 34.04  | 71.53    | 7          | 7                 | 22         | 68     | 7.6   | 10.03    | 10.03    |
| Q3154     | Sec translocase accessory complex subunit YacJ OS-Rhodospirillum rubrum (strain ATCC 17023 / 2.4.1 / NCBI 8253 / DSM 158) OX-27294 (Gn- <i>yacJ</i> PE-3 Sv+1) [Q3154_RH056]   | 31.74  | 42.59    | 1          | 4                 | 4          | 23     | 108   | 11.5     | 9.63     |
| Q3155     | Uncharacterized protein OS-Rhodospirillum rubrum (strain ATCC 17023 / 2.4.1 / NCBI 8253 / DSM 158) OX-27294 (Gn- <i>yacJ</i> PE-3 Sv+1) [Q3155_RH056]                          | 31.60  | 66.67    | 5          | 7                 | 32         | 90     | 10.0  | 10.0     | 8.25     |
| Q3187     | Ni2+-sulfur oxidoreductase subunit C OS-Rhodospirillum rubrum (strain ATCC 17023 / 2.4.1 / NCBI 8253 / DSM 158) OX-27294 (Gn- <i>nrkC</i> PE-3 Sv+1) [NRK_RH056]               | 30.11  | 12.87    | 1          | 2                 | 14         | 109    | 12.9  | 13.17    | 5.17     |
| Q3186     | Reaction center protein H chain OS-Rhodospirillum rubrum (strain ATCC 17023 / 2.4.1 / NCBI 8253 / DSM 158) OX-27294 (Gn- <i>rpkH</i> PE-3 Sv+1) [RCRH_RH056]                   | 29.26  | 15.91    | 5          | 5                 | 27         | 308    | 34.5  | 64.4     | 6.64     |
| Q3189     | Uncharacterized protein OS-Rhodospirillum rubrum (strain ATCC 17023 / 2.4.1 / NCBI 8253 / DSM 158) OX-27294 (Gn- <i>rpkH</i> PE-3 Sv+1) [Q3189_RH056]                          | 28.18  | 38.87    | 1          | 1                 | 1          | 20     | 33    | 33       | 33.00    |
| Q3145     | LigR-InvSensing protein B-0002 beta chain OS-Rhodospirillum rubrum (strain ATCC 17023 / 2.4.1 / NCBI 8253 / DSM 158) OX-27294 (Gn- <i>atpB</i> PE-3 Sv+1) [LH2_RH056]          | 23.98  | 58.82    | 3          | 4                 | 16         | 53     | 8.4   | 5.67     | 5.67     |
| Q3145     | Reaction center protein L chain OS-Rhodospirillum rubrum (strain ATCC 17023 / 2.4.1 / NCBI 8253 / DSM 158) OX-27294 (Gn- <i>rplL</i> PE-3 Sv+1) [RCL_RH056]                    | 18.79  | 15.25    | 1          | 4                 | 4          | 28     | 3.4   | 7.53     | 7.53     |
| Q3123     | ATP synthase subunit c OS-Rhodospirillum rubrum (strain ATCC 17023 / 2.4.1 / NCBI 8253 / DSM 158) OX-27294 (Gn- <i>atpC</i> PE-3 Sv+1) [ATPR_RH056]                            | 18.59  | 12.82    | 1          | 1                 | 12         | 78     | 2.7   | 4.89     | 4.89     |
| Q3195     | ATP-dependent zinc metalloprotease Pf1 OS-Rhodospirillum rubrum (strain ATCC 17023 / 2.4.1 / NCBI 8253 / DSM 158) OX-27294 (Gn- <i>atpZ</i> PE-3 Sv+1) [Q3195_RH056]           | 14.77  | 62.36    | 3          | 3                 | 8          | 62     | 68.5  | 5.92     | 5.92     |
| Q3192     | Cytochrome b-c1 subunit IV OS-Rhodospirillum rubrum (strain ATCC 17023 / 2.4.1 / NCBI 8253 / DSM 158) OX-27294 (Gn- <i>cytbc</i> PE-4 Sv+1) [Q3192_RH056]                      | 14.12  | 37.10    | 6          | 6                 | 14         | 124    | 14.4  | 9.39     | 9.39     |
| Q3193     | Uncharacterized protein OS-Rhodospirillum rubrum (strain ATCC 17023 / 2.4.1 / NCBI 8253 / DSM 158) OX-27294 (Gn- <i>cytbc</i> PE-4 Sv+1) [Q3193_RH056]                         | 13.81  | 21.10    | 4          | 4                 | 9          | 238    | 24.9  | 10.10    | 10.10    |
| Q3193     | ATP synthase subunit alpha OS-Rhodospirillum rubrum (strain ATCC 17023 / 2.4.1 / NCBI 8253 / DSM 158) OX-27294 (Gn- <i>atpA</i> PE-3 Sv+1) [ATPR_RH056]                        | 13.75  | 32.39    | 5          | 5                 | 9          | 51     | 8.2   | 6.49     | 6.49     |
| Q3193     | 5S ribosomal protein L11 OS-Rhodospirillum rubrum (strain ATCC 17023 / 2.4.1 / NCBI 8253 / DSM 158) OX-27294 (Gn- <i>rplK11</i> PE-3 Sv+1) [R11_RH056]                         | 13.35  | 46.21    | 2          | 2                 | 2          | 73     | 8.1   | 9.09     | 9.09     |
| Q3197     | Native integral membrane protein OS-Rhodospirillum rubrum (strain ATCC 17023 / 2.4.1 / NCBI 8253 / DSM 158) OX-27294 (Gn- <i>rps8</i> PE-4 Sv+1) [Q3197_RH056]                 | 12.21  | 22.22    | 4          | 4                 | 9          | 126    | 14.2  | 10.61    | 10.61    |
| Q3185     | Uncharacterized protein OS-Rhodospirillum rubrum (strain ATCC 17023 / 2.4.1 / NCBI 8253 / DSM 158) OX-27294 (Gn- <i>rps8</i> PE-4 Sv+1) [Q3185_RH056]                          | 11.56  | 34.69    | 4          | 4                 | 12         | 147    | 16.1  | 10.11    | 10.11    |
| Q3185     | Sec-independent protein translocase protein YafB OS-Rhodospirillum rubrum (strain ATCC 17023 / 2.4.1 / NCBI 8253 / DSM 158) OX-27294 (Gn- <i>yafB</i> PE-3 Sv+1) [YAFB_RH056]  | 11.56  | 34.69    | 4          | 4                 | 12         | 147    | 16.1  | 10.11    | 10.11    |
| Q3170     | Reaction center protein H chain OS-Rhodospirillum rubrum (strain ATCC 17023 / 2.4.1 / NCBI 8253 / DSM 158) OX-27294 (Gn- <i>rpkH</i> PE-3 Sv+1) [RCRH_RH056]                   | 11.08  | 38.85    | 7          | 7                 | 33         | 200    | 28.0  | 30.3     | 30.3     |
| Q3161     | Uncharacterized protein OS-Rhodospirillum rubrum (strain ATCC 17023 / 2.4.1 / NCBI 8253 / DSM 158) OX-27294 (Gn- <i>rpkH</i> PE-3 Sv+1) [Q3161_RH056]                          | 10.82  | 27.78    | 2          | 2                 | 10         | 72     | 7.8   | 8.62     | 8.62     |
| Q3162     | 5S ribosomal protein L2 OS-Rhodospirillum rubrum (strain ATCC 17023 / 2.4.1 / NCBI 8253 / DSM 158) OX-27294 (Gn- <i>rplK2</i> PE-3 Sv+1) [R2_RH056]                            | 10.60  | 11.25    | 2          | 2                 | 2          | 2      | 3.9   | 9.99     | 9.99     |
| Q3160     | ATP synthase chain 0 OS-Rhodospirillum rubrum (strain ATCC 17023 / 2.4.1 / NCBI 8253 / DSM 158) OX-27294 (Gn- <i>atp0</i> PE-3 Sv+1) [ATPR_RH056]                              | 10.22  | 11.25    | 2          | 2                 | 14         | 102    | 10.4  | 10.4     | 10.40    |
| Q3127     | Saccharate dehydrogenase subunit C OS-Rhodospirillum rubrum (strain ATCC 17023 / 2.4.1 / NCBI 8253 / DSM 158) OX-27294 (Gn- <i>sdhC</i> PE-4 Sv+1) [Q3127_RH056]               | 10.16  | 26.77    | 4          | 4                 | 10         | 127    | 14.3  | 7.44     | 7.44     |
| Q3120     | Ni2+-sulfur oxidoreductase subunit K OS-Rhodospirillum rubrum (strain ATCC 17023 / 2.4.1 / NCBI 8253 / DSM 158) OX-27294 (Gn- <i>nrkK</i> PE-3 Sv+1) [Q3120_RH056]             | 10.39  | 14.71    | 2          | 2                 | 2          | 102    | 10.6  | 10.6     | 10.61    |
| Q3174     | Sec-independent protein translocase protein YafB OS-Rhodospirillum rubrum (strain ATCC 17023 / 2.4.1 / NCBI 8253 / DSM 158) OX-27294 (Gn- <i>yafB</i> PE-3 Sv+1) [Q3174_RH056] | 9.83   | 24.29    | 5          | 5                 | 18         | 70     | 7.5   | 8.57     | 8.57     |
| Q3136     | Sec-independent protein translocase protein YafB OS-Rhodospirillum rubrum (strain ATCC 17023 / 2.4.1 / NCBI 8253 / DSM 158) OX-27294 (Gn- <i>yafB</i> PE-3 Sv+1) [Q3136_RH056] | 9.83   | 24.29    | 5          | 5                 | 18         | 70     | 7.5   | 8.57     | 8.57     |
| Q3194     | 5S ribosomal protein L11 OS-Rhodospirillum rubrum (strain ATCC 17023 / 2.4.1 / NCBI 8253 / DSM 158) OX-27294 (Gn- <i>rplK11</i> PE-3 Sv+1) [R11_RH056]                         | 8.89   | 25.33    | 3          | 3                 | 11         | 150    | 15.7  | 9.99     | 9.99     |
| Q3194     | Uncharacterized protein OS-Rhodospirillum rubrum (strain ATCC 17023 / 2.4.1 / NCBI 8253 / DSM 158) OX-27294 (Gn- <i>rplK11</i> PE-3 Sv+1) [Q3194_RH056]                        | 8.78   | 34.86    | 1          | 1                 | 1          | 5      | 16.2  | 16.2     | 16.21    |
| Q3192     | Uncharacterized protein OS-Rhodospirillum rubrum (strain ATCC 17023 / 2.4.1 / NCBI 8253 / DSM 158) OX-27294 (Gn- <i>rplK11</i> PE-3 Sv+1) [Q3192_RH056]                        | 8.58   | 34.86    | 1          | 1                 | 1          | 1      | 11.9  | 11.9     | 11.91    |
| Q3198     | Uncharacterized protein OS-Rhodospirillum rubrum (strain ATCC 17023 / 2.4.1 / NCBI 8253 / DSM 158) OX-27294 (Gn- <i>rplK11</i> PE-3 Sv+1) [Q3198_RH056]                        | 8.54   | 35.96    | 3          | 3                 | 3          | 15     | 10.3  | 7.42     | 7.42     |
| Q3162     | Integration host factor subunit beta OS-Rhodospirillum rubrum (strain ATCC 17023 / 2.4.1 / NCBI 8253 / DSM 158) OX-27294 (Gn- <i>ihfB</i> PE-3 Sv+1) [IHF_RH056]               | 8.09   | 29.63    | 3          | 3                 | 9          | 95     | 10.6  | 9.96     | 9.96     |
| Q3154     | Strigon regulator protein 01 OS-Rhodospirillum rubrum (strain ATCC 17023 / 2.4.1 / NCBI 8253 / DSM 158) OX-27294 (Gn- <i>str01</i> PE-3 Sv+1) [Q3154_RH056]                    | 7.67   | 31.79    | 4          | 4                 | 9          | 146    | 15.6  | 8.38     | 8.38     |
| Q3194     | Cytochrome c2 OS-Rhodospirillum rubrum (strain ATCC 17023 / 2.4.1 / NCBI 8253 / DSM 158) OX-27294 (Gn- <i>cytC2</i> PE-3 Sv+1) [CYC2_RH056]                                    | 7.57   | 33.79    | 4          | 4                 | 9          | 146    | 15.6  | 8.38     | 8.38     |
| Q3160     | 5S ribosomal protein L33 OS-Rhodospirillum rubrum (strain ATCC 17023 / 2.4.1 / NCBI 8253 / DSM 158) OX-27294 (Gn- <i>rplK33</i> PE-3 Sv+1) [R33_RH056]                         | 7.53   | 25.45    | 1          | 1                 | 4          | 55     | 6.4   | 10.20    | 10.20    |
| Q3160     | Uncharacterized protein OS-Rhodospirillum rubrum (strain ATCC 17023 / 2.4.1 / NCBI 8253 / DSM 158) OX-27294 (Gn- <i>rplK33</i> PE-3 Sv+1) [Q3160_RH056]                        | 7.50   | 25.41    | 2          | 2                 | 2          | 19     | 3.2   | 3.57     | 3.57     |
| Q3161     | Native integral membrane protein OS-Rhodospirillum rubrum (strain ATCC 17023 / 2.4.1 / NCBI 8253 / DSM 158) OX-27294 (Gn- <i>rps20</i> PE-4 Sv+1) [Q3161_RH056]                | 7.32   | 24.61    | 3          | 3                 | 14         | 54     | 16.8  | 10.00    | 10.00    |
| Q3127     | Saccharate dehydrogenase subunit C OS-Rhodospirillum rubrum (strain ATCC 17023 / 2.4.1 / NCBI 8253 / DSM 158) OX-27294 (Gn- <i>sdhC</i> PE-4 Sv+1) [Q3127_RH056]               | 6.52   | 10.57    | 1          | 1                 | 1          | 123    | 13.6  | 9.96     | 9.96     |
| Q3146     | Uncharacterized protein OS-Rhodospirillum rubrum (strain ATCC 17023 / 2.4.1 / NCBI 8253 / DSM 158) OX-27294 (Gn- <i>sdhC</i> PE-4 Sv+1) [Q3146_RH056]                          | 6.52   | 10.57    | 1          | 1                 | 1          | 3      | 8.4   | 9.31     | 9.31     |
| Q3195     | Native integral membrane protein OS-Rhodospirillum rubrum (strain ATCC 17023 / 2.4.1 / NCBI 8253 / DSM 158) OX-27294 (Gn- <i>sdhC</i> PE-4 Sv+1) [Q3195_RH056]                 | 6.52   | 10.57    | 1          | 1                 | 1          | 3      | 8.4   | 9.31     | 9.31     |
| Q3198     | Uncharacterized protein OS-Rhodospirillum rubrum (strain ATCC 17023 / 2.4.1 / NCBI 8253 / DSM 158) OX-27294 (Gn- <i>sdhC</i> PE-4 Sv+1) [Q3198_RH056]                          | 5.68   | 14.93    | 1          | 1                 | 1          | 5      | 6.7   | 7.4      | 7.41     |
| Q3183     | Ni2+-sulfur oxidoreductase subunit I OS-Rhodospirillum rubrum (strain ATCC 17023 / 2.4.1 / NCBI 8253 / DSM 158) OX-27294 (Gn- <i>nrkI</i> PE-3 Sv+1) [Q3183_RH056]             | 5.65   | 11.27    | 2          | 2                 | 2          | 204    | 22.4  | 7.18     | 7.18     |
| Q3184     | Hydroxide effluxer 18 family OS-Rhodospirillum rubrum (strain ATCC 17023 / 2.4.1 / NCBI 8253 / DSM 158) OX-27294 (Gn- <i>hfe18</i> PE-3 Sv+1) [Q3184_RH056]                    | 5.38   | 26.6     | 3          | 3                 | 8          | 136    | 8.82  | 8.82     | 8.82     |
| Q3129     | Ni2+-sulfur oxidoreductase subunit OS-Rhodospirillum rubrum (strain ATCC 17023 / 2.4.1 / NCBI 8253 / DSM 158) OX-27294 (Gn- <i>nrk0</i> PE-3 Sv+1) [Q3129_RH056]               | 5.38   | 26.6     | 3          | 3                 | 8          | 136    | 8.82  | 8.82     | 8.82     |
| Q3141     | ATP synthase subunit beta OS-Rhodospirillum rubrum (strain ATCC 17023 / 2.4.1 / NCBI 8253 / DSM 158) OX-27294 (Gn- <i>atpB</i> PE-3 Sv+1) [ATPR_RH056]                         | 5.42   | 9.47     | 3          | 3                 | 5          | 475    | 50.4  | 4.98     | 4.98     |
| Q3120     | Acetyl-CoA acetyltransferase OS-Rhodospirillum rubrum (strain ATCC 17023 / 2.4.1 / NCBI 8253 / DSM 158) OX-27294 (Gn- <i>acetylCoA</i> PE-3 Sv+1) [Q3120_RH056]                | 5.17   | 24.81    | 1          | 1                 | 1          | 2      | 39.1  | 40.5     | 16.02    |
| Q3174     | Native integral membrane protein OS-Rhodospirillum rubrum (strain ATCC 17023 / 2.4.1 / NCBI 8253 / DSM 158) OX-27294 (Gn- <i>atpB</i> PE-3 Sv+1) [Q3174_RH056]                 | 4.67   | 24.81    | 1          | 1                 | 1          | 2      | 39.1  | 40.5     | 16.02    |
| Q3161     | 5S ribosomal protein L20 OS-Rhodospirillum rubrum (strain ATCC 17023 / 2.4.1 / NCBI 8253 / DSM 158) OX-27294 (Gn- <i>rplK20</i> PE-3 Sv+1) [R20_RH056]                         | 4.94   | 17.50    | 1          | 1                 | 1          | 2      | 10.1  | 11.5     | 6.62     |
| Q3127     | Native conserved small protein OS-Rhodospirillum rubrum (strain ATCC 17023 / 2.4.1 / NCBI 8253 / DSM 158) OX-27294 (Gn- <i>rps32</i> PE-4 Sv+1) [Q3127_RH056]                  | 4.82   | 17.33    | 1          | 1                 | 2          | 76     | 6.8   | 11.58    | 11.58    |
| Q3162     | 5S ribosomal protein L3 OS-Rhodospirillum rubrum (strain ATCC 17023 / 2.4.1 / NCBI 8253 / DSM 158) OX-27294 (Gn- <i>rplK3</i> PE-3 Sv+1) [R3_RH056]                            | 4.70   | 17.74    | 2          | 2                 | 4          | 66     | 6.6   | 10.97    | 10.97    |
| Q3162     | Uncharacterized protein OS-Rhodospirillum rubrum (strain ATCC 17023 / 2.4.1 / NCBI 8253 / DSM 158) OX-27294 (Gn- <i>rplK3</i> PE-3 Sv+1) [Q3162_RH056]                         | 4.62   | 30.75    | 1          | 1                 | 1          | 1      | 6.9   | 6.9      | 6.91     |
| Q3162     | Uncharacterized protein OS-Rhodospirillum rubrum (strain ATCC 17023 / 2.4.1 / NCBI 8253 / DSM 158) OX-27294 (Gn- <i>rplK3</i> PE-3 Sv+1) [Q3162_RH056]                         | 4.42   | 14.77    | 2          | 2                 | 2          | 3      | 14.9  | 15.7     | 15.71    |
| Q3124     | Uncharacterized protein OS-Rhodospirillum rubrum (strain ATCC 17023 / 2.4.1 / NCBI 8253 / DSM 158) OX-27294 (Gn- <i>rplK3</i> PE-3 Sv+1) [Q3124_RH056]                         | 4.31   | 14.95    | 1          | 1                 | 1          | 1      | 10.7  | 12.2     | 4.88     |
| Q3181     | Ni2+-sulfur oxidoreductase subunit A OS-Rhodospirillum rubrum (strain ATCC 17023 / 2.4.1 / NCBI 8253 / DSM 158) OX-27294 (Gn- <i>nrkA</i> PE-3 Sv+1) [Q3181_RH056]             | 4.29   | 14.95    | 1          | 1                 | 1          | 1      | 14.9  | 15.2     | 4.88     |
| Q3160     | Ironin transporter OS-Rhodospirillum rubrum (strain ATCC 17023 / 2.4.1 / NCBI 8253 / DSM 158) OX-27294 (Gn- <i>r</i>                                                           |        |          |            |                   |            |        |       |          |          |
